# Supplementary material for: Hierarchical porous carbon with ordered straight micro-channels templated by continuous filament glass fiber arrays for high performance supercapacitors
Source: Royal Society of Chemistry journal article supplement (doi:10.1039/c6ta09229b), 2016-12-06
Supplement: c6ta09229b1.pdf [file c6ta09229b1.pdf]

## Hierarchical porous carbon with ordered straight micro-channels templated by continuous filament glass fiber array for high performance supercapacitors

Dedong Jia,<sup>a</sup> Xin Yu,<sup>a</sup> Hua Tan,<sup>b</sup> Xuequan Li,<sup>a</sup> Feng Han,<sup>\*c</sup> Linlin Li,<sup>\*a</sup> Hong Liu<sup>\*ab</sup>

<sup>a</sup> Beijing Institute of Nanoenergy and Nanosystems, Chinese Academy of Sciences, Beijing 100083, China.

<sup>b</sup> State Key Laboratory of Crystal Materials, Shandong University, Jinan 250100, P. R. China.

<sup>c</sup> Institute of Engineering Thermodynamics, German Aerospace Center, Stuttgart 70569, Germany.

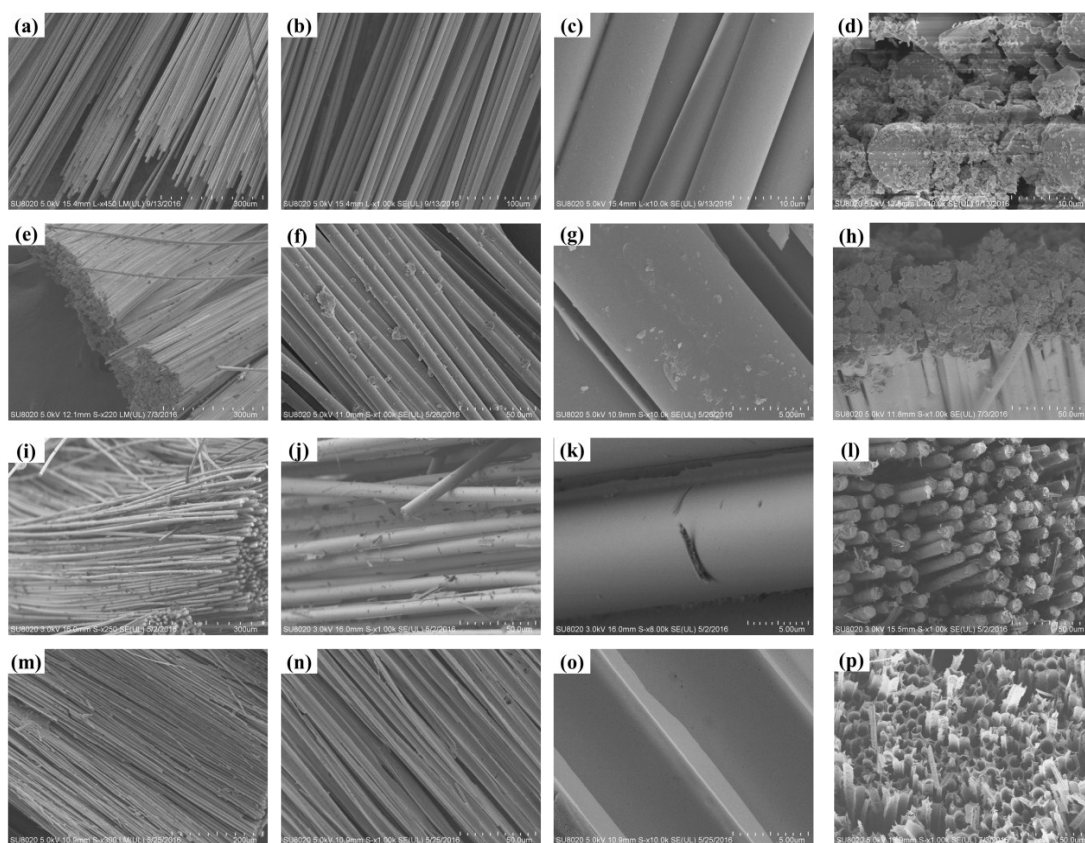

**Figure S1** SEM images of continuous filament glass fibers (a-d); glucose filled bundled glass fiber array hybrid (e-h); carbon filled bundled glass fiber array (i-l); GTSDC of etched away glass fiber array (m-p).

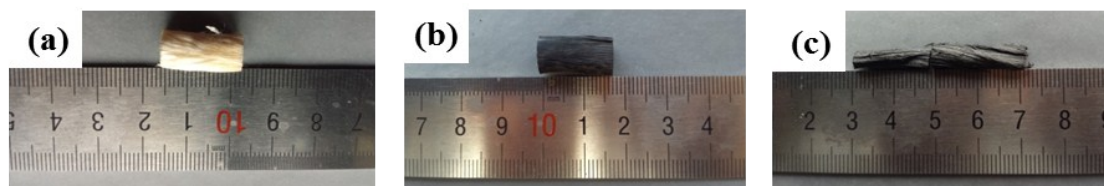

**Figure S2** The photographic images of glucose filled glass fiber array (a); carbon filled glass fiber array (b); GTSDC of etching away glass fiber array (c).

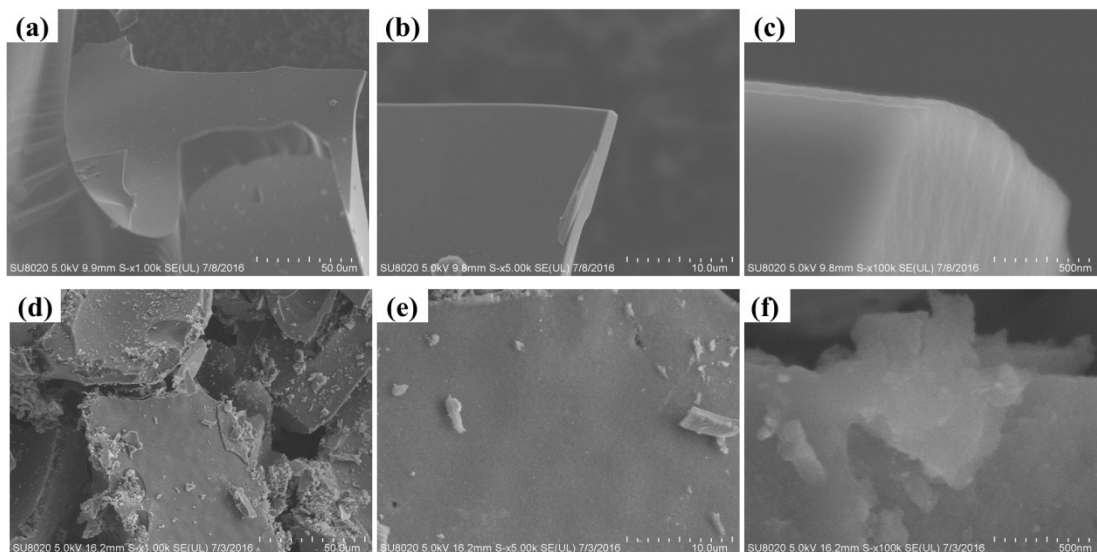

**Figure S3** SEM images of glucose directly carbonized at 800 °C (GDC) (a-c); GDC activated by KOH at 900 °C (GDC-900) (d-f).

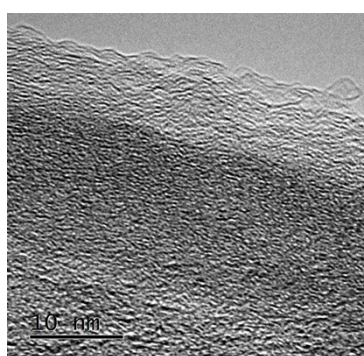

**Figure S4** HRTEM image of GTSDC without KOH activation

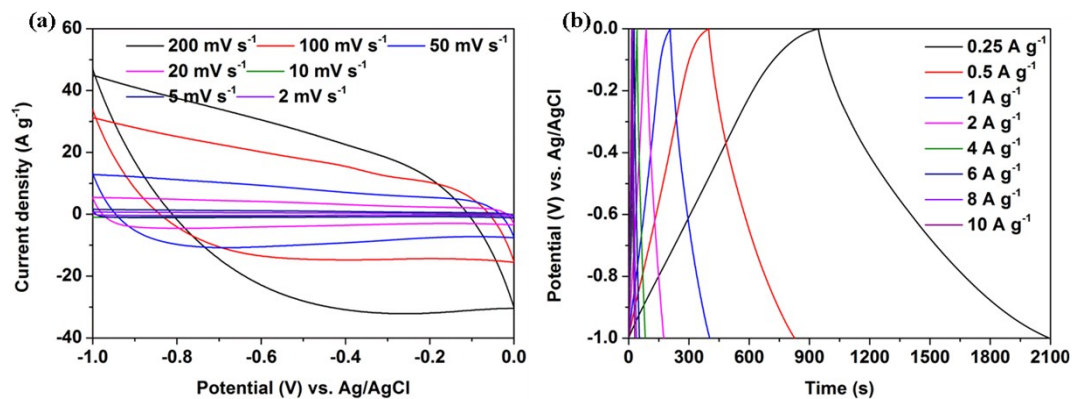

**Figure S5** CV curves of GDTS-900 at different scan rates (a) and galvanostatic charge/discharge curves under different current density (b).

**Table S1** Specific capacitance as a function of the scan rates ( $\text{mV s}^{-1}$ ).

| Scan rate \ Sample | 2     | 5     | 10    | 20    | 50    | 100   | 200   |
|--------------------|-------|-------|-------|-------|-------|-------|-------|
| <b>GDC</b>         | 33.2  | 31    | 26.7  | 21.7  | 14.4  | 10    | 6.4   |
| <b>GDC-900</b>     | 133.5 | 128   | 122.4 | 118.8 | 56    | 50.8  | 47.5  |
| <b>GTSDC</b>       | 66.9  | 62.7  | 57.5  | 49.9  | 36.7  | 27.2  | 18.9  |
| <b>GTSDC-700</b>   | 131.4 | 125.7 | 114.7 | 104.4 | 84.8  | 69.2  | 53.8  |
| <b>GTSDC-800</b>   | 159   | 151.6 | 145.5 | 138.5 | 124.6 | 107.9 | 83.6  |
| <b>GTSDC-900</b>   | 200   | 193   | 187.4 | 180.4 | 166.6 | 153.1 | 126.6 |
| <b>GTSDC-1000</b>  | 132.9 | 123.8 | 118.2 | 111.5 | 98.5  | 83.2  | 65    |

**Table S2** Specific capacitance as a function of the current density ( $\text{A g}^{-1}$ )

| Current density \ Sample | 0.25  | 0.5   | 1     | 2     | 4     | 6     | 8     | 10  |
|--------------------------|-------|-------|-------|-------|-------|-------|-------|-----|
| <b>GDC</b>               | 44.4  | 31.9  | 21    | 12.6  | 5.6   | 3.8   | 1.6   | 1   |
| <b>GDC-900</b>           | 198.5 | 145.6 | 119   | 143.4 | 132   | 128.4 | 122.4 | 117 |
| <b>GTSDC</b>             | 60.3  | 53.6  | 43.6  | 36.2  | 31.2  | 23.4  | 17.6  | 14  |
| <b>GTSDC-700</b>         | 144.3 | 128.1 | 96    | 89.6  | 78.4  | 70.8  | 65.6  | 61  |
| <b>GTSDC-800</b>         | 188   | 162.5 | 145   | 134.8 | 132.8 | 129   | 119.2 | 113 |
| <b>GTSDC-900</b>         | 283   | 213.6 | 196.3 | 173.8 | 164   | 157.8 | 152.8 | 148 |
| <b>GTSDC-1000</b>        | 146.3 | 129.3 | 120.2 | 115   | 104   | 97.8  | 91.2  | 84  |

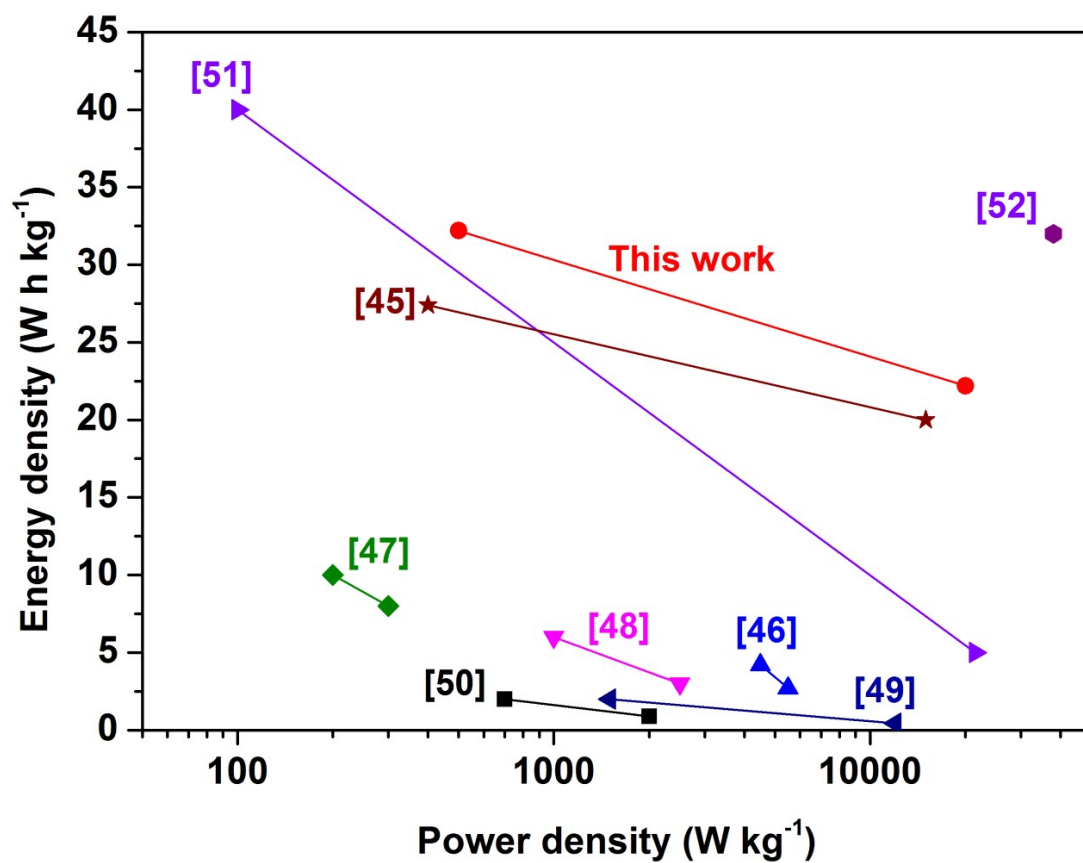

Figure S6 Performance comparison of our cell versus previously reported carbon symmetric supercapacitors in aqueous electrolyte.
